1 **Bisphenol S and bisphenol F are less disruptive to cardiac electrophysiology and**  
2 **potentially safer for use in medical products, as compared to bisphenol A**

3  
4 Tomas Prudencio<sup>1,2</sup>, Luther Swift<sup>1,2</sup>, Devon Guerrelli<sup>1,2,3</sup>, Blake Cooper<sup>1,2,4</sup>, Marissa Reilly<sup>1,2</sup>,  
5 Nina Ciccarrelli<sup>1,2</sup>, Jiansong Sheng<sup>6</sup>, Rafael Jaimes III<sup>1,2</sup>, Nikki Gillum Posnack<sup>1,2,4,5</sup>

6  
7  
8  
9 Children's National Hospital, Washington DC, USA  
10 <sup>1</sup>Sheikh Zayed Institute for Pediatric Surgical Innovation  
11 <sup>2</sup>Children's National Heart Institute

12  
13 George Washington University, Washington DC, USA  
14 <sup>3</sup>Department of Biomedical Engineering  
15 <sup>4</sup>Department of Pharmacology & Physiology  
16 <sup>5</sup>Department of Pediatrics

17  
18 <sup>6</sup>CiPA labs, Rockville MD, USA

19

20 **Corresponding author:**

21 Nikki Gillum Posnack, Ph.D.  
22 Sheikh Zayed Institute, 6<sup>th</sup> floor, M7707  
23 111 Michigan Avenue, NW  
24 Washington, DC, USA 20010  
25 Tel: (202) 476-2475  
26 Email: [nposnack@childrensnational.org](mailto:nposnack@childrensnational.org)  
27

28 **Conflict of interest:** None.

29

30

31

32

33

34 **ABSTRACT**

35 **Background:** Bisphenol A (BPA) is a high-production volume chemical that is commonly used to  
36 manufacture consumer and medical-grade plastic products. Due to its ubiquity, the general  
37 population can incur daily environmental exposure to BPA, while heightened BPA exposure has  
38 been reported in intensive care patients and industrial workers. Due to health concerns,  
39 structural analogues are being explored as replacements for BPA.

40 **Objective:** This study aimed to examine the direct nongenomic effects of BPA on cardiac  
41 electrophysiology and compare its safety profile to recently developed alternatives, including  
42 BPS (bisphenol S) and BPF (bisphenol F).

43 **Methods:** Whole-cell voltage-clamp recordings were performed on cell lines transfected with  
44 Nav1.5, hERG, or Cav1.2. Results of single channel experiments were validated by conducting  
45 electrophysiology studies on human induced pluripotent stem cell-derived cardiomyocytes  
46 (hiPSC-CM) and intact, whole heart preparations.

47 **Results:** Of the chemicals tested, BPA was the most potent inhibitor of both fast ( $I_{Na-P}$ ) and late  
48 ( $I_{Na-L}$ ) sodium channel ( $IC_{50} = 55.3$  and  $23.6 \mu M$ , respectively), L-type calcium channel ( $IC_{50} =$   
49  $30.8 \mu M$ ) and hERG channel current ( $IC_{50} = 127 \mu M$ ). The inhibitory effects of BPA and BPF on  
50 L-type calcium channels were supported by microelectrode array recordings, which revealed  
51 shortening of the extracellular field potential (akin to QT interval). Further, BPA and BPF  
52 exposure impaired atrioventricular conduction in intact, whole heart experiments. BPS did not  
53 alter any of the cardiac electrophysiology parameters tested.

54 **Discussion:** Results of this study demonstrate that BPA and BPF exert an immediate inhibitory  
55 effect on cardiac ion channels, and that BPS may be a safer alternative. Intracellular signaling  
56 or genomic effects of bisphenol analogues were not investigated; therefore, additional  
57 mechanistic studies are necessary to fully elucidate the safety profile of bisphenol analogues on  
58 the heart.

59

60

## 61 **INTRODUCTION**

62 Bisphenol A (BPA) is a high production volume chemical, with roughly 8 million metric tons used  
63 each year to manufacture polycarbonate plastics (e.g., food and beverage containers, medical  
64 devices), epoxy resins (e.g., aluminum can liners), and in thermal printing applications (PR  
65 newswire 2016; Shelby 2008). Human exposure to BPA can occur daily, and as a result,  
66 biomonitoring studies have detected BPA in 91-99% of the general population (Calafat et al.  
67 2005; Chen et al. 2016a; Lehmler et al. 2018; Vandenberg et al. 2007, 2010). Although  
68 environmental exposure to BPA occurs at a relatively low dose (Koch and Calafat 2009;  
69 Vandenberg et al. 2007, 2010), occupational (Hines et al. 2018; Ribeiro et al. 2017) and clinical  
70 environments can result in exceedingly high BPA exposure (Calafat et al. 2009; Duty et al.  
71 2013; Gaynor et al. 2018; Huygh et al. 2015; Testai et al. 2016). Indeed, BPA was detected in  
72 60% of neonatal intensive care unit (NICU) supplies, including items used for feeding,  
73 bandages, breathing support, intravenous and parenteral infusion (Iribarne-Durán et al. 2019).  
74 Clinical exposure can also result in heightened and/or prolonged BPA exposure in young  
75 patients, due to an underdeveloped metabolic system (Calafat et al. 2009). In the NICU setting,  
76 premature infants had urinary BPA levels that ranged from 1.6–946 µg/L (Calafat et al. 2009)  
77 and the degree of exposure was linked to high-intensity treatment that required multiple (plastic)  
78 medical devices (Duty et al. 2013). Similarly, adult ICU patients were found to have urinary BPA  
79 levels that ranged from 6.1–680 µg/L when undergoing extracorporeal membrane oxygenation  
80 in conjunction with continuous vevo-venous hemofiltration (Huygh et al. 2015).

81  
82 BPA exposure is concerning, particularly in sensitive patient populations, as accumulating  
83 evidence suggests that BPA exerts a negative impact on cardiovascular health (Bae et al. 2012;  
84 Bae and Hong 2015; Han and Hong 2016; Melzer et al. 2010, 2012). A 10-year longitudinal  
85 study found that BPA exposure was associated with a 46-49% higher hazard ratio for  
86 cardiovascular and all-cause mortality (Bao et al. 2020). Further, epidemiological studies have  
87 reported associations between BPA exposure and an increased risk of myocardial infarction,  
88 hypertension, coronary and peripheral artery disease, and a decrease in heart rate variability  
89 (reviewed previously (Posnack 2014; Ramadan et al. 2020). Experimental studies have noted  
90 that BPA exposure can antagonize ion channels, impair electrical conduction, and precipitate  
91 triggered arrhythmias (Belcher et al. 2011; Deutschmann et al. 2013; Feiteiro et al. 2018;  
92 Michaela et al. 2014; Posnack et al. 2015; Wang et al. 2011; Yan et al. 2011). *In vitro* studies  
93 performed in HEK, neuronal, and smooth muscle cells have shown that BPA inhibits T-type and  
94 L-type calcium channel current (Deutschmann et al. 2013; Feiteiro et al. 2018; Michaela et al.

95 2014). In cardiac tissue, such an alteration in calcium channel current would alter nodal cell  
96 depolarization, atrioventricular conduction, and the plateau phase of the cardiac action potential.  
97 Further, BPA exposure can disrupt intracellular calcium handling, resulting in calcium leak from  
98 the sarcoplasmic reticulum and an increased propensity for triggered arrhythmias (Gao et al.  
99 2013; Liang et al. 2014; Ramadan et al. 2018). Of interest, BPA exposure was observed to  
100 increase calcium-mediated triggered activity and ventricular arrhythmias in females (but not  
101 males) that were subjected to catecholamine stress. Notably, such alterations in calcium  
102 handling were attenuated in an estrogen-receptor knockout model (Yan et al. 2011), which  
103 supports the claim that BPA-induced effects are sex specific.

104  
105 With increasing health concerns, structurally similar chemicals are being explored as  
106 replacements for BPA (Chen et al. 2016a). Two such substitutes, bisphenol S (BPS) and  
107 bisphenol F (BPF), are used to manufacture consumer products that don 'BPA-free' labeling.  
108 For example, BPS is used to produce polyethersulfone plastic food containers, medical-grade  
109 products, epoxy resins, and is found in thermal printing applications (Chen et al. 2016a; Lehmler  
110 et al. 2018). Unfortunately, many of these alternative chemicals are considered 'regrettable  
111 substitutions', as BPS and BPF may exert biological effects that are similar to BPA (Kojima et al.  
112 2019; Moon 2019; Trasande 2017). To date, it is unclear whether BPA alternatives offer a  
113 superior cardiac safety profile, as recent work suggests that BPS and BPF may also impair  
114 cardiac function (Ferguson et al. 2019; Gao et al. 2015; Mu et al. 2019). Recent biomonitoring  
115 studies have observed an uptick in BPS and BPF exposure in the general population as BPA is  
116 phased out and replaced (Lehmler et al. 2018), which highlights the urgent need to investigate  
117 the impact of BPA analogues on cardiac health.

118  
119 We compared the cardiac safety profile of BPA, BPS, and BPF using whole-cell voltage clamp  
120 experiments to identify the half maximal inhibitory concentration ( $IC_{50}$ ) of four key cardiac ion  
121 channels, highlighted by the CiPA (comprehensive in vitro proarrhythmia) initiative (Colatsky et  
122 al. 2016; Sager et al. 2014). The results of single channel experiments were validated by  
123 conducting electrophysiology studies on human induced pluripotent stem cell-derived  
124 cardiomyocytes (hiPSC-CM) using microelectrode array (MEA) recordings. Importantly, hiPSC-  
125 CM have been widely adopted as a tool for preclinical safety testing to measure alterations in  
126 cardiac automaticity, conduction velocity, depolarization, and repolarization time (Chen et al.  
127 2016b). To aid in the translation of our *in vitro* cell studies, we employed an intact, whole heart  
128 preparation for direct assessment of cardiac electrophysiology. We hypothesized that inhibitory

129 effects of bisphenol chemicals on calcium current would present with delayed atrioventricular  
130 conduction in cardiac preparations. Further, we hypothesized that BPS and/or BPF exposure  
131 would have less effect on cardiac electrophysiology, due to differences in chemical structure  
132 that may increase the potency of BPA for voltage-gated channels (Deutschmann et al. 2013).

133

## 134 **METHODS**

### 135 Reagents

136 Bisphenol A (CAS #80-05-7), bisphenol S (CAS #80-09-1), and bisphenol F (CAS #620-92-8)  
137 were purchased from Sigma Aldrich ( $\geq 98\%$  purity, analytical standard). Stock solutions of BPA,  
138 BPS, or BPF were prepared in 99+% dimethyl sulfoxide (DMSO), and working concentrations  
139 were prepared directly in cell culture media (voltage-clamp recordings, MEA studies) or Krebs-  
140 Henseleit (KH) crystalloid buffer (intact heart preparations) to obtain a final concentration  
141 between 0.01-100  $\mu\text{M}$  BPA, BPS, or BPF. This range of doses was selected to mimic  
142 environmental, clinical, and supraphysiological exposure levels (Ramadan et al. 2018).

143

### 144 Whole-cell voltage-clamp recordings

145 Nav1.5, Cav1.2, and hERG channel recordings were performed at room temperature (25°C)  
146 using stably transfected cell lines, as previously described (Jaimes et al. 2019). For Nav1.5  
147 recordings, the extracellular solution included 137 mM NaCl, 10 mM dextrose, 10 mM HEPES, 4  
148 mM KCl, 1 mM  $\text{MgCl}_2$ , and 1 mM  $\text{CaCl}_2$ . The intracellular solution consisted of 120 mM CsOH,  
149 120 mM aspartic acid, 10 mM EGTA, 10 mM CsCl, 10 mM HEPES, 5 MgATP, and 0.4 mM Tris-  
150 GTP. The voltage protocol was approximately 1 sec in duration, repeated at 0.1 Hz. Sodium  
151 channel recordings were performed using HEK293 cells transfected with Nav1.5 cDNA. Cells  
152 were repolarized from -95 to -120 mV for 200 msec, depolarized from -120 to -15 mV for 40  
153 msec, and then further depolarized to +40 mV for 200 msec. This was followed immediately by  
154 a voltage ramp down phase from +40 to -95 mV for 100 msec. ATXII (20 nmol/L) was included  
155 in the extracellular solution to induce Nav1.5 late current, as previously described (Mantegazza  
156 et al. 1998). Tetrodotoxin (30  $\mu\text{M}$ ) was applied at the end of each recording to determine the  
157 current baseline. Cav1.2 recordings were performed using CHO cells stably transfected with  
158 Cav1.2 cDNA. Cells were depolarized from -80 mV to 0 mV for 40 msec, further depolarized to  
159 +30 mV for 200 msec, followed by a voltage ramp down phase from +30 mV to -80 mV for 100  
160 msec. Recording stability was assessed by applying the voltage protocol in control solution for  
161 12 consecutively recorded traces with <10% difference. hERG recordings were performed using  
162 HEK293 cells stably transfected with hERG cDNA. The extracellular solution included 130 mM

163 NaCl, 12.5 mM dextrose, 10 mM HEPES, 5 mM KCl, 1 mM MgCl<sub>2</sub>:6H<sub>2</sub>O, and 1 mM CaCl<sub>2</sub>. The  
164 intracellular solution consisted of 120 K-gluconate, 20 mM KCl, 10 mM HEPES, 5 EGTA, and  
165 1.5 MgATP. The voltage protocol was 5 sec in duration, repeated at 0.1 Hz. Cells were  
166 depolarized -80 mV to +40 mV for 500 msec, followed by a voltage ramp down phase from +40  
167 mV to -80 mV for 100 msec. A hERG potassium channel blocker (10 μM E-4031) was applied at  
168 the end of each recording to determine the baseline. Recordings were collected before and after  
169 bisphenol chemical exposure; chemical potency was calculated by dividing the steady state  
170 current amplitude by the average amplitude from the last 5 traces measured in control solution  
171 to calculate the fractional block. This was plotted against the bisphenol chemical concentration  
172 tested, fitted with the Hill Equation to generate a half-maximal inhibitory concentration (IC<sub>50</sub>) and  
173 the Hill coefficient.

174

#### 175 Human cardiomyocyte microelectrode array recordings

176 hiPSC-CM (iCell cardiomyocytes<sup>2</sup>, female donor #01434, Fujifilm) were plated onto fibronectin-  
177 coated microelectrode arrays at a density of 50-75,000 cells/well (24-well plate, Axion). Cells  
178 were defrosted in iCell cardiomyocyte plating media in a cell culture incubator (37°C, 5% CO<sub>2</sub>)  
179 for 2 hours, thereafter cells were cultured in iCell maintenance media for the duration of study.  
180 Treatment groups included 0.01% DMSO (vehicle), 0.01-100 μM BPA, BPS, or BPF. Cells were  
181 treated for 15 minutes, and then extracellular field potential signals were recorded in response  
182 to external stimulation (1-2 Hz). Extracellular field potential duration (FPD) was measured and  
183 rate corrected with Frederica formula (FPDc). Disturbances in the recorded waveform can be  
184 used to predict the identity of ion channels impacted by chemical exposure, with FPD analogous  
185 to an *in vitro* QT interval that correlates with action potential duration at 50% repolarization  
186 (Asakura et al.; Clements 2016).

187

#### 188 Animals

189 Animal protocols were approved by the Institutional Animal Care and Use Committee at  
190 Children's National Research Institute and followed the National Institutes of Health's *Guide for*  
191 *the Care and Use of Laboratory Animals*. Bisphenol chemicals are xenoestrogens that may  
192 cause exaggerated cardiac effects in females (Ben-Jonathan and Steinmetz 1998; Yan et al.  
193 2011); accordingly, experiments were performed using female Sprague-Dawley rats, aged 3-4  
194 months (Taconic Biosciences, strain NTac:SD, from NIH Genetic Resource stock, n=66).  
195 Animals were housed in conventional acrylic rat cages in the Research Animal Facility, under  
196 standard environmental conditions (12:12 hour light:dark cycle, 18–25°C, 30-70% humidity).

197 Each animal served as its own control, with electrophysiology measurements collected at  
198 baseline and again after treatment.

199

#### 200 Intact heart preparations

201 Animals were anesthetized with 3% isoflurane; the chest was opened, the heart was rapidly  
202 excised, and the aorta was cannulated. The isolated, intact heart was then transferred to a  
203 temperature-controlled (37°C) constant-pressure (70 mmHg) Langendorff-perfusion system.  
204 Excised hearts were perfused with a modified Krebs-Henseleit buffer bubbled with carbogen, as  
205 previously described (Jaimes et al. 2019). Pseudo-electrocardiograms (ECG) were recorded in  
206 lead II configuration, and biosignals were acquired in iox2 and analyzed in ecgAUTO. Isolated  
207 hearts remained stable with minimal fluctuations in heart rate or electrophysiology parameters  
208 following 0.01% DMSO media perfusion (vehicle; **Figure 1**). To account for animal variability,  
209 ECG recordings were collected throughout the study, during control media perfusion (15 min)  
210 and in response to bisphenol chemical exposure (15 min). Similarly, electrophysiology  
211 measurements (see below) were measured at baseline, after 15 min chemical exposure, and  
212 again after 15 min washout with KH media.

213

#### 214 Electrophysiology measurements

215 A pacing electrode was positioned on the right atrium for assessment of atrioventricular (AV)  
216 conduction time, AV node refractory period (AVNERP) and Wenckebach cycle length (WBCL).  
217 WBCL was defined as the shortest S1-S1 pacing interval that resulted in 1:1 atrioventricular  
218 conduction. AVNERP was defined as the shortest S1-S2 pacing interval that resulted in 1:1  
219 atrioventricular conduction. Electrophysiology studies were performed using a Bloom Classic  
220 electrophysiology stimulator (Fisher Medical) set to a pacing current 1.5x the minimum pacing  
221 threshold, with 1 msec monophasic pulse width. For each parameter, the pacing cycle length  
222 (PCL) was decremented to pinpoint the PCL before loss of capture was observed.

223

#### 224 Statistical Analysis

225 Results are reported as mean  $\pm$  standard deviation. Data normality was assessed by Shapiro-  
226 Wilk testing (Graphpad Prism). Statistical analysis was performed using one-way analysis of  
227 variance (ANOVA) for microelectrode array recordings or two-way analysis of variance with  
228 repeated measures (RM-ANOVA) to compare baseline vs treatment in whole heart experiments.  
229 Significance was defined by an adjusted p-value ( $q < 0.1$ ) after multiple comparisons testing with  
230 a false discovery rate of 0.1; significance is denoted in the figures with an asterisk (\*).

## 231 **RESULTS**

### 232 **BPA exerts a greater inhibitory effect on ion channels, compared with BPS or BPF**

233 Whole-cell voltage clamp recordings were performed on cells transfected with one of four  
234 cardiac ion channels, as highlighted by CiPA (Colatsky et al. 2016; Sager et al. 2014). Currents  
235 were evoked and recorded before and after exposure to BPA, BPS, or BPF, and a half-maximal  
236 inhibitory concentration ( $IC_{50}$ ) was computed by testing the respective affinities to each ion  
237 channel. Collectively, BPA had the highest affinity for each ion channel tested, compared to  
238 both BPF and BPS, and current suppression was concentration dependent (**Figure 2,3**). Peak  
239 sodium current ( $I_{Na-P}$ ) was suppressed with an  $IC_{50}$  of 55.3  $\mu$ M BPA, 232  $\mu$ M BPF, and 1090  $\mu$ M  
240 for BPS; late sodium current ( $I_{Na-L}$ ) was suppressed at lower doses, with a computed  $IC_{50}$  of 23.6  
241  $\mu$ M BPA, 100  $\mu$ M BPF, and 369  $\mu$ M BPS (**Figure 2A,B**). In ventricular tissue,  $I_{Na-P}$  is responsible  
242 for action potential upstroke (phase 0) and  $I_{Na-L}$  is involved in the plateau phase (phase 2).  
243 Accordingly, inhibition of  $I_{Na-P}$  is likely to slow depolarization and electrical conduction, while  
244 inhibition of  $I_{Na-L}$  can shorten the action potential duration. L-type calcium channel current ( $I_{CaL}$ )  
245 was also the most sensitive to BPA exposure, with an  $IC_{50}$  of 30.8  $\mu$ M, compared to 76  $\mu$ M BPF  
246 and 333  $\mu$ M BPS (**Figure 3A**). In ventricular myocytes, calcium current ( $I_{CaL}$ ) plays a prominent  
247 role in the plateau phase, and also contributes to the action potential upstroke in nodal cells.  
248 Inhibition of  $I_{CaL}$  can slow sinus rate, delay atrioventricular conduction, and shorten the  
249 ventricular myocyte action potential. Finally, the rapid delayed rectifier potassium current ( $I_{Kr}$ )  
250 was suppressed at higher bisphenol concentrations, with a measured  $IC_{50}$  of 127  $\mu$ M BPA, 209  
251  $\mu$ M BPF, and 633  $\mu$ M BPS (**Figure 3B**). Bisphenol exposure could suppress  $I_{Kr}$  and prolong  
252 cardiac repolarization (phase 3) at high concentrations.

253

### 254 **BPA and BPF exposure alters the extracellular field potential of human cardiomyocytes**

255 To validate the effects of bisphenol chemicals on cardiac electrophysiology, we employed  
256 hiPSC-CM that express key cardiac ion channels (Edwards and Louch 2017). hiPSC-CM were  
257 cultured atop microelectrodes and extracellular field potentials were recorded (**Figure 4A, D, G**),  
258 with FPD measurements analogous to an *in vitro* QT interval that correlates with the action  
259 potential duration (Asakura et al.; Clements 2016). Acute BPA exposure resulted in a slight non-  
260 monotonic dose response (**Figure 4B**), wherein no effect on FPDc was observed at the lowest  
261 BPA dose tested (0.01  $\mu$ M) and a 7.5% increase in FPDc was observed at 100 nM BPA  
262 ( $q < 0.005$ ). Notably, low dose effects have previously been reported for BPA and other  
263 endocrine-disrupting chemicals that can present with a non-monotonic dose response  
264 (Birnbaum 2012; Vandenberg 2014). At higher BPA doses, FPDc shortened significantly



265 compared to the vehicle (13.8% at 30  $\mu$ M, 37.3% at 100  $\mu$ M,  $q < 0.0001$ ). Low dose effects were  
266 not observed for either BPF or BPS (**Figure 4E, H**). However, BPF exposure resulted in FPDc  
267 shortening at higher concentrations (3.7% at 10  $\mu$ M ( $q < 0.05$ ), 12.5% at 30  $\mu$ M ( $q < 0.0001$ ),  
268 32.4% at 100  $\mu$ M ( $q < 0.0001$ )). Treatment with BPS did not alter FPDc at any of the tested  
269 concentrations. FPDc restitution curves were generated by increasing the pacing frequency (1-2  
270 Hz). A frequency-dependent effect was not observed for BPA in hiPSC-CM, although BPF  
271 exhibited a slight reverse-use dependency with FPDc shortening more prominent at slower  
272 frequencies (**Figure 4C, F**).

273

#### 274 **BPA and BPF exposure slows heart rate**

275 To aid in the translation of our *in vitro* findings, we quantified the acute effects of BPA, BPF, and  
276 BPS on cardiac electrophysiology using an *ex vivo* intact heart preparation. Heart preparations  
277 exhibited normal sinus rhythm when perfused with control KH media ( $327.7 \pm 36.8$  BPM) and  
278 KH media supplemented with vehicle ( $327.6 \pm 40.3$  BPM; **Figure 1C**). BPA exposure resulted in  
279 a measurable decline in heart rate, which may be partly attributed to calcium channel current  
280 inhibition. Sinus rate slowed by 16.6% ( $q < 0.01$ ) and 85.4% ( $q < 0.0001$ ) after exposure to 10  $\mu$ M  
281 and 100  $\mu$ M BPA, respectively (relative to baseline recording; **Figure 5A,B**). This depressive  
282 effect culminated in cessation of ventricular electrical activity in 62% of heart preparations  
283 treated with 100  $\mu$ M BPA (**Figure 5D**). Heart rate slowing was immediate, yet reversible, as  
284 sinus rhythm recovered quickly after removal of BPA and replacement with control media  
285 perfusion. A non-monotonic BPA dose response relationship was not observed. Heart rate also  
286 slowed by 12.5% ( $q < 0.001$ ) after exposure to 100  $\mu$ M BPF, the only dose to significantly affect  
287 automaticity (**Figure 5E**). Conversely, no significant change in sinus rhythm or rate were  
288 observed after exposure to BPS (**Figure 5G**).

289

#### 290 **BPA and BPF exposure slows atrioventricular conduction**

291 Heart preparations exhibited stable atrial and atrioventricular conduction with control media  
292 perfusion ( $15.3 \pm 2.8$  msec P duration,  $33.6 \pm 1.4$  msec PR interval), and during perfusion with  
293 media supplemented with vehicle ( $16.3 \pm 4.0$  msec P duration,  $35.3 \pm 3.1$  msec PR interval).  
294 Concurrent with heart rate slowing due to BPA exposure, we also observed significant  
295 lengthening of both the P duration and PR interval. A prolonged P duration was only observed  
296 at the highest BPA dose ( $39.8 \pm 16.6$  msec at 100  $\mu$ M BPA, **Figure 6B**), whereas the PR  
297 interval progressively lengthened with higher BPA concentrations (**Figure 6A, D**). BPA  
298 exposure resulted in variable degrees of atrioventricular (AV) block, ranging from 1<sup>st</sup> degree to

299 intermittent 3<sup>rd</sup> degree AV block (**Figure 6D**). Notably, the acute effect of BPA on AV conduction  
300 was reversible with a rapid recovery of the PR interval time after washout (**Figure 6E**). Atrial  
301 pacing was implemented, and AV conduction slowing persisted at multiple PCL (**Figure 6F**).  
302 BPF exposure also lengthened the PR interval, albeit the effect was much less pronounced  
303 (+19.6% 100  $\mu$ M BPF). There was no observable change in AV conduction following BPS  
304 exposure (**Figure 6I**).

305

### 306 **BPA and BPF exposure increases atrioventricular nodal refractoriness**

307 To further investigate slowed AV conduction in the presence of bisphenols, incremental atrial  
308 pacing was implemented to pinpoint the Wenckebach phenomenon. WBCL was comparable  
309 between control media perfusion ( $87 \pm 6.2$  msec) and during perfusion with vehicle ( $90 \pm 6.5$   
310 msec). But, proved to be a highly sensitive parameter for bisphenol-induced slowing of AV  
311 conduction (**Figure 7A,B**). BPA exposure altered WBCL in a dose-dependent manner beginning  
312 at a low nanomolar concentration (+7.6% 0.01  $\mu$ M BPA ( $q < 0.1$ ); +68% 100  $\mu$ M BPA  
313 ( $q < 0.0001$ )), suggesting a lengthening of the relative refractory period. Pinpointing an accurate  
314 WBCL after 100  $\mu$ M BPA exposure was confounded by loss of capture at the slowest cycle  
315 length tested (150 msec; **Figure 7C**). BPF exposure had a moderate effect on WBCL, but only  
316 at the highest concentration tested (22.5% 100  $\mu$ M BPF ( $q < 0.0001$ )). BPS exposure did not alter  
317 WBCL, which was in agreement with PR interval measurements during sinus rhythm (**Figure**  
318 **7G**). Extrastimulus pacing was also performed to measure the effective refractory period of the  
319 atrioventricular node. Similar to WBCL measurements, BPA exposure increased AV node  
320 refractoriness in a dose-dependent manner (**Figure 8A,B**), beginning with modest changes at a  
321 low nanomolar concentration (+9.2% 0.001  $\mu$ M BPA ( $q < 0.05$ )) and increasing thereafter  
322 (+95.7% 100  $\mu$ M BPA ( $q < 0.0001$ )). BPF exposure had a moderate effect on AVNERP, but only  
323 at the highest concentration tested (20.7% 100  $\mu$ M BPF ( $q < 0.0001$ )). BPS exposure did not alter  
324 AVNERP (**Figure 8G**).

325

### 326 **DISCUSSION**

327 This is the first study to compare the direct effects of BPA, BPS, and BPF on cardiac  
328 electrophysiology using both *in vitro* and *ex vivo* cardiac preparations. In the described study,  
329 we demonstrate that BPA is the most potent inhibitor of sodium, calcium and potassium channel  
330 currents – as compared to the chemical alternatives, BPS and BPF. Using a range of  
331 concentrations that encompass environmental, clinical, and supraphysiological exposures, we  
332 found that BPA exerted the greatest effect on automaticity and atrioventricular conduction.

333 Electrical disturbances were largely focused on nodal and atrioventricular conduction, with  
334 negligible effects on cardiac repolarization or arrhythmia susceptibility. Results of this study  
335 indicate that BPS is significantly less disruptive to cardiac electrophysiology and may serve as a  
336 safer chemical alternative for plastic medical products. It is important to note that in the context  
337 of industrial or clinical environments, individuals can present with urinary BPA concentrations  
338 that are exceedingly high – reaching 4-8  $\mu\text{M}$  (Calafat et al. 2009; He et al. 2009; Wang et al.  
339 2012). Notably, this study focused on acute bisphenol exposure and the direct impact on  
340 cardiac electrophysiology endpoints; as such, we did not investigate intracellular signaling or  
341 possible genomic effects of bisphenol chemicals. Additional mechanistic studies are required to  
342 fully elucidate the safety profile of bisphenol chemicals on cardiac electrical and mechanical  
343 function, and report on the chronic effects of bisphenol exposure.

344

#### 345 Bisphenol chemicals and calcium ion homeostasis

346 Of the bisphenol chemicals tested in this study, BPA was the most potent inhibitor of L-type  
347 calcium channels with an  $\text{IC}_{50} = 30.8 \mu\text{M}$ . This finding is in agreement with the literature, which  
348 reported an immediate, inhibitory effect of BPA on T-type calcium channels in HEK cells ( $\text{IC}_{50} =$   
349  $6\text{-}33 \mu\text{M}$ , depending on channel subtype; (Michaela et al. 2014)). Similarly, Deutschmann, et al.  
350 reported that BPA rapidly and reversibly inhibited calcium current through L-, N-, P/Q-, R-, and  
351 T-type calcium channels in rat endocrine cells, dorsal root ganglion, cardiomyocytes, and  
352 transfected HEK cells ( $\text{IC}_{50} = 26\text{-}35 \mu\text{M}$ ; (Deutschmann et al. 2013)). Studies suggest that the  
353 inhibitory effect of bisphenol chemicals on calcium channel current are influenced by the  
354 chemical structure and bridge between the two phenol rings, with reduced inhibitory effects  
355 anticipated for BPS and BPF (Deutschmann et al. 2013). In cardiac tissue, calcium channels  
356 play an important role in nodal cell depolarization, atrioventricular conduction, the plateau phase  
357 of the cardiac action potential, and contractility. Indeed, recent studies have shown that BPA  
358 can alter cardiac electrophysiology, likely through a calcium-dependent mechanism. Sinus  
359 bradycardia and delayed electrical conduction have been reported after BPA exposure, using *in*  
360 *vivo* and *ex vivo* models (Belcher et al. 2015; Patel et al. 2015; Posnack et al. 2014; Valokola et  
361 al. 2019). Patel et al. observed conduction slowing in BPA-exposed animals subjected to  
362 catecholamine stress, although this effect was limited to females (Patel et al. 2015). BPA-  
363 induced heart rate slowing was also reported in *in vivo* studies conducted by Belcher, et al.,  
364 although the authors noted that this effect may be attributed to autonomic dysregulation  
365 (Belcher et al. 2015). In addition to electrophysiology disturbances, BPA-exposure has been  
366 shown to alter intracellular calcium handling, which can increase calcium leak from the

367 sarcoplasmic reticulum (Yan et al. 2011), increase the incidence of calcium-mediated  
368 arrhythmias, and precipitate calcium amplitude alternans (Ramadan et al. 2018). Studies  
369 suggest that intracellular calcium handling may be influenced by posttranslational modifications  
370 of key calcium proteins, via an estrogen-mediated mechanism (Liang et al. 2014).

371

#### 372 Bisphenol chemicals and sodium channel current

373 Similar to calcium channel inhibition, we found that BPA was the most potent inhibitor of fast  
374 ( $I_{Na-P}$ ) and late ( $I_{Na-L}$ ) sodium channel ( $IC_{50} = 55.3$  and  $23.6 \mu M$ , respectively). This finding is in  
375 agreement with previously published studies, which reported that BPA blocks fast-voltage gated  
376 sodium channels in transfected HEK cells ( $IC_{50} = 25 \mu M$ ; (O'Reilly et al. 2012)) and isolated  
377 dorsal root ganglion neurons ( $IC_{50} = 40 \mu M$ ; (Wang et al. 2011)). These effects were rapid,  
378 reversible, and dose-dependent (Wang et al. 2011). Moreover, in isolated ganglion neurons, the  
379 described effects were attenuated with protein kinase A (PKA) or protein kinase C (PKC)  
380 inhibitors, suggesting an underlying protein-kinase dependent pathway. In cardiac tissue, the  
381 fast voltage-gated sodium channel ( $I_{Na-P}$ ; TTX-sensitive) is responsible for the action potential  
382 upstroke and blockade is likely to reduce the rate of depolarization and slow conduction velocity.  
383 Late-sodium channel current (TTX-insensitive) is active during the action potential plateau  
384 phase, and blockade is expected to shorten repolarization time, which in turn, reduces calcium  
385 channel current (Horváth et al. 2020). This highlights the importance of performing  
386 electrophysiology studies using cardiac models (e.g., human cardiomyocytes, isolated whole  
387 heart, in vivo studies) in conjunction with single channel studies, given the dynamic nature of  
388 cardiac electrophysiology.

389

#### 390 Bisphenol chemicals and estrogen-receptor signaling

391 Since BPA is classified as a xenoestrogen, alterations in cardiac function may also be attributed  
392 to its interaction with estrogen receptors. In the presented study, we utilized female cardiac  
393 preparations since previous reports have indicated that BPA-induced effects on calcium  
394 handling and electrical instabilities can be heightened in female animals, exacerbated in the  
395 presence of estradiol, and attenuated in ER $\beta$  knockout animals (Belcher et al. 2011; Yan et al.  
396 2011). Further, studies have shown that 17 $\beta$ -estradiol alone can rapidly and reversibly inhibit  
397 sodium and calcium channels, in a concentration dependent manner (DY et al. 2002; Wang et  
398 al. 2013). Accordingly, the effects of BPA on cardiac electrophysiology may be mediated by  
399 direct interaction with ion channels at the cell membrane and/or intracellular signaling pathways  
400 precipitated by estrogen receptor binding. Of interest, BPS and BPF have also been shown to

401 display estrogenic activity that is comparable to BPA (Kojima et al. 2019; Moreman et al. 2017).  
402 Although in the presented study, we identified clear differences in the potency of BPA, BPS, and  
403 BPF as it relates to ion channel inhibition and cardiac electrophysiology parameters.

404

#### 405 Cardiac safety profile of bisphenol A analogues

406 Biomonitoring studies have recently reported an uptick in BPS and BPF exposure in the general  
407 population, as manufacturers begin to phase out and replace BPA in some consumer and  
408 medical products. As an example, data from the 2013-2014 National Health and Nutrition  
409 Examination Survey (NHANES) detected BPA, BPS, and BPF in 96%, 90%, and 67% of urinary  
410 samples from the general population (Lehmle et al. 2018). Yet, very little is known about the  
411 effects of these substitute chemicals on cardiovascular health, and whether they offer a superior  
412 safety profile. Using a zebrafish model, Chen et al. reported that BPS exposure results in  
413 transcriptional changes that can increase inflammation, alter cardiac morphology, and *decrease*  
414 heart rate (Qiu et al. 2020). In a rodent cardiac model, BPS-treatment alone was shown to  
415 *increase* heart rate, while the addition of catecholamine stress increased the propensity for  
416 premature ventricular contractions and calcium-mediated triggered activity (Gao et al. 2015).  
417 The authors noted that the observed effect on cardiac electrophysiology was sex-specific and  
418 mediated via estrogen receptor- $\beta$  signaling, which alters the phosphorylation status of key  
419 calcium handling proteins. Notably, the same group has reported nearly identical effects with  
420 BPA-treatment, which suggest that the two chemicals may act via a common mechanism (Yan  
421 et al. 2011). In a separate study by Ferguson, et al., BPS or BPA-treatment rapidly reduced  
422 mechanical function in heart preparations, but slightly different post-translational modifications  
423 were observed in myofilament proteins (Ferguson et al. 2019). Investigations into the cardiac  
424 effects of BPF are even more limited, with a single report noting a decrease in the heart rate of  
425 zebrafish following BPF-exposure (Mu et al. 2019). The current study was focused on cardiac  
426 electrophysiology outcomes, therefore, additional work is needed to assess the impact of BPA,  
427 BPF, and BPS on myocardial contractility.

428

429 To the best of our knowledge, our study is the first to compare the acute effects of BPA, BPS,  
430 and BPF exposure on cardiac electrophysiology. We aimed to identify the  $IC_{50}$  concentrations  
431 for BPA, BPS, and BPF on key cardiac ion channels highlighted by the CiPA initiative – and  
432 validate the effect of those concentrations on human cardiomyocyte and intact heart  
433 preparations. Collectively, we observed that BPA exposure has a more potent effect on cardiac  
434 electrophysiology, as compared to the chemical substitutes BPF and BPS. Our results suggest

435 that BPS may be a safer chemical alternative, particularly for medical devices that are used to  
436 treat vulnerable patient populations that are at increased risk for bisphenol chemical exposure.  
437 Nevertheless, a few limitations to our study should be considered. Although we included a  
438 number of models in our study, further in-depth mechanistic work is necessary to fully elucidate  
439 the safety profile of bisphenol chemicals – including the impact on intracellular targets, genomic  
440 and proteomic expression profiles (sub-acute or chronic studies), and autonomic regulation (in  
441 vivo studies). There are also notable differences in cardiac electrophysiology between rodents  
442 and humans (e.g., ion channel expression, sinus rate, action potential morphology) which  
443 should be noted when considering the translation of experimental studies to humans.

444

#### 445 **ACKNOWLEDGEMENTS**

446 This work was supported by the National Institutes of Health (R01HL139472 to NGP), Children’s  
447 National Heart Institute, Sheikh Zayed Institute for Pediatric Surgical Innovation, and the  
448 Children’s National Research Institute. This publication was also supported by the Gloria and  
449 Steven Seelig family.

450

451

452

453

454 **REFERENCES**

- 455
- 456 Asakura K, Hayashi S, Ojima A, Taniguchi T, Miyamoto N, Nakamori C, et al. Improvement of  
457 acquisition and analysis methods in multi-electrode array experiments with iPS cell-derived  
458 cardiomyocytes. *J Pharmacol Toxicol Methods* 75: 17–26.
- 459 Bae S, Hong Y-C. 2015. Exposure to bisphenol A from drinking canned beverages increases  
460 blood pressure: randomized crossover trial. *Hypertension* 65:313–319;  
461 doi:10.1161/HYPERTENSIONAHA.114.04261.
- 462 Bae S, Kim JH, Lim Y-H, Park HY, Hong Y-C. 2012. Associations of bisphenol A exposure with  
463 heart rate variability and blood pressure. *Hypertension* 60:786–793;  
464 doi:10.1161/HYPERTENSIONAHA.112.197715.
- 465 Bao W, Liu B, Rong S, Dai SY, Trasande L, Lehmler HJ. 2020. Association Between Bisphenol  
466 A Exposure and Risk of All-Cause and Cause-Specific Mortality in US Adults. *JAMA Netw*  
467 *open* 3:e2011620; doi:10.1001/jamanetworkopen.2020.11620.
- 468 Belcher SM, Chen Y, Yan S, Wang H-SS. 2011. Rapid Estrogen Receptor-Mediated  
469 Mechanisms Determine the Sexually Dimorphic Sensitivity of Ventricular Myocytes to  
470 17beta-Estradiol and the Environmental Endocrine Disruptor Bisphenol A . *Endocrinology*  
471 153:712–720; doi:10.1210/en.2011-1772.
- 472 Belcher SM, Gear RB, Kendig EL. 2015. Bisphenol A Alters Autonomic Tone and Extracellular  
473 Matrix Structure and Induces Sex-Specific Effects on Cardiovascular Function in Male and  
474 Female CD-1 Mice. *Endocrinology* 156:882–895; doi:10.1210/en.2014-1847.
- 475 Ben-Jonathan N, Steinmetz R. 1998. Xenoestrogens: The emerging story of bisphenol A.  
476 *Trends Endocrinol Metab* 9:124–128; doi:10.1016/S1043-2760(98)00029-0.
- 477 Birnbaum LS. 2012. Environmental chemicals: Evaluating low-dose effects. *Environ Health*  
478 *Perspect* 120; doi:10.1289/ehp.1205179.
- 479 Calafat AM, Kuklennyik Z, Reidy JA, Caudill SP, Ekong J, Needham LL. 2005. Urinary  
480 concentrations of bisphenol A and 4-Nonylphenol in a human reference population. *Environ*  
481 *Health Perspect* 113:391–395; doi:10.1289/ehp.7534.
- 482 Calafat AM, Weuve J, Ye X, Jia LT, Hu H, Ringer S, et al. 2009. Exposure to bisphenol A and  
483 other phenols in neonatal intensive care unit premature infants. *Environ Health Perspect*  
484 117:639–644; doi:10.1289/ehp.0800265.
- 485 Chen D, Kannan K, Tan H, Zheng Z, Feng Y-L, Wu Y, et al. 2016a. Bisphenol Analogues Other  
486 Than BPA: Environmental Occurrence, Human Exposure, and Toxicity—A Review. *Environ*  
487 *Sci Technol* 50:5438–5453; doi:10.1021/acs.est.5b05387.
- 488 Chen IY, Matsa E, Wu JC. 2016b. Induced pluripotent stem cells: at the heart of cardiovascular  
489 precision medicine. *Nat Publ Gr* 13; doi:10.1038/nrcardio.2016.36.
- 490 Clements M. 2016. Multielectrode Array (MEA) Assay for Profiling Electrophysiological Drug  
491 Effects in Human Stem Cell-Derived Cardiomyocytes. In: *Current Protocols in Toxicology*.  
492 Vol. 68 of. John Wiley & Sons, Inc.:Hoboken, NJ, USA. 22.4.1-22.4.32.
- 493 Colatsky T, Fermini B, Gintant G, Pierson JB, Sager P, Sekino Y, et al. 2016. The  
494 Comprehensive in Vitro Proarrhythmia Assay (CiPA) initiative - Update on progress. *J*  
495 *Pharmacol Toxicol Methods* 81:15–20; doi:10.1016/j.vascn.2016.06.002.
- 496 Deutschmann A, Hans M, Meyer R, Häberlein H, Swandulla D. 2013. Bisphenol A inhibits  
497 voltage-activated Ca(2+) channels in vitro: mechanisms and structural requirements. *Mol*  
498 *Pharmacol* 83:501–511; doi:10.1124/mol.112.081372.
- 499 Duty SM, Mendonca K, Hauser R, Calafat AM, Ye X, Meeker JD, et al. 2013. Potential sources  
500 of bisphenol a in the neonatal intensive care unit. *Pediatrics* 131:483–489;  
501 doi:10.1542/peds.2012-1380.
- 502 DY L, YG C, EB L, KW K, SY N, TH O, et al. 2002. 17Beta-estradiol inhibits high-voltage-  
503 activated calcium channel currents in rat sensory neurons via a non-genomic mechanism.  
504 *Life Sci* 70; doi:10.1016/S0024-3205(01)01534-X.

- 505 Edwards AG, Louch WE. 2017. Species-Dependent Mechanisms of Cardiac Arrhythmia: A  
506 Cellular Focus. *Clin Med Insights Cardiol* 11; doi:10.1177/1179546816686061.
- 507 Feiteiro J, Mariana M, Glória S, Cairrao E. 2018. Inhibition of L-type calcium channels by  
508 Bisphenol A in rat aorta smooth muscle. *J Toxicol Sci* 43:579–586; doi:10.2131/jts.43.579.
- 509 Ferguson M, Lorenzen-Schmidt I, Pyle WG. 2019. Bisphenol S rapidly depresses heart function  
510 through estrogen receptor- $\beta$  and decreases phospholamban phosphorylation in a sex-  
511 dependent manner. *Sci Rep* 9:15948; doi:10.1038/s41598-019-52350-y.
- 512 Gao X, Liang Q, Chen Y, Wang H-SS. 2013. Molecular mechanisms underlying the rapid  
513 arrhythmogenic action of bisphenol A in female rat hearts. *Endocrinology* 154:4607–4617;  
514 doi:10.1210/en.2013-1737.
- 515 Gao X, Ma J, Chen Y, Wang H-S. 2015. Rapid responses and mechanism of action for low-  
516 dose bisphenol S on ex vivo rat hearts and isolated myocytes: evidence of female-specific  
517 proarrhythmic effects. *Environ Health Perspect* 123:571–8; doi:10.1289/ehp.1408679.
- 518 Gaynor JW, Ittenbach RF, Calafat AM, Burnham NB, Bradman A, Bellinger DC, et al. 2018.  
519 Perioperative Exposure to Suspect Neurotoxicants from Medical Devices in Newborns with  
520 Congenital Heart Defects. *Ann Thorac Surg* 107:567–572;  
521 doi:10.1016/j.athoracsur.2018.06.035.
- 522 Han C, Hong Y-C. 2016. Bisphenol A, Hypertension, and Cardiovascular Diseases:  
523 Epidemiological, Laboratory, and Clinical Trial Evidence. *Curr Hypertens Rep* 18:11;  
524 doi:10.1007/s11906-015-0617-2.
- 525 He Y, Miao M, Wu C, Yuan W, Gao E, Zhou Z, et al. 2009. Occupational exposure levels of  
526 bisphenol A among Chinese workers. *J Occup Health* 51:432–6; doi:10.1539/joh.o9006.
- 527 Hines CJ, Christianson AL, Jackson M V, Ye X, Pretty JR, Arnold JE, et al. 2018. An Evaluation  
528 of the Relationship among Urine, Air, and Hand Measures of Exposure to Bisphenol A  
529 (BPA) in US Manufacturing Workers. *Ann Work Expo Heal* 62:840–851;  
530 doi:10.1093/annweh/wxy042.
- 531 Horváth B, Hézsó T, Kiss D, Kistamás K, Magyar J, Nánási PP, et al. 2020. Late Sodium  
532 Current Inhibitors as Potential Antiarrhythmic Agents. *Front Pharmacol* 11:413;  
533 doi:10.3389/fphar.2020.00413.
- 534 Huygh J, Clotman K, Malarvannan G, Covaci A, Schepens T, Verbrugghe W, et al. 2015.  
535 Considerable exposure to the endocrine disrupting chemicals phthalates and bisphenol-A  
536 in intensive care unit (ICU) patients. *Environ Int* 81:64–72;  
537 doi:10.1016/j.envint.2015.04.008.
- 538 Iribarne-Durán LM, Artacho-Cordón F, Peña-Caballero M, Molina-Molina JM, Jiménez-Díaz I,  
539 Vela-Soria F, et al. 2019. Presence of bisphenol a and parabens in a neonatal intensive  
540 care unit: An exploratory study of potential sources of exposure. *Environ Health Perspect*  
541 127; doi:10.1289/EHP5564.
- 542 Jaimes R, McCullough D, Siegel B, Swift L, McInerney D, Hiebert J, et al. 2019. Plasticizer  
543 Interaction with the Heart: Chemicals Used in Plastic Medical Devices Can Interfere with  
544 Cardiac Electrophysiology. *Circ Arrhythmia Electrophysiol* 12;  
545 doi:10.1161/CIRCEP.119.007294.
- 546 Koch HM, Calafat AM. 2009. Human body burdens of chemicals used in plastic manufacture.  
547 *Philos Trans R Soc B Biol Sci* 364:2063–2078; doi:10.1098/rstb.2008.0208.
- 548 Kojima H, Takeuchi S, Sanoh S, Okuda K, Kitamura S, Uramaru N, et al. 2019. Profiling of  
549 bisphenol A and eight of its analogues on transcriptional activity via human nuclear  
550 receptors. *Toxicology* 413:48–55; doi:10.1016/J.TOX.2018.12.001.
- 551 Lehmler HJ, Liu B, Gadogbe M, Bao W. 2018. Exposure to Bisphenol A, Bisphenol F, and  
552 Bisphenol S in U.S. Adults and Children: The National Health and Nutrition Examination  
553 Survey 2013-2014. *ACS Omega* 3:6523–6532; doi:10.1021/acsomega.8b00824.
- 554 Liang Q, Gao X, Chen Y, Hong K, Wang H-SS. 2014. Cellular mechanism of the nonmonotonic  
555 dose response of bisphenol A in rat cardiac myocytes. *Environ Health Perspect* 122:601–



- 556 608; doi:10.1289/ehp.1307491.
- 557 Mantegazza M, Franceschetti S, Avanzini G. 1998. Anemone toxin (ATX II)-induced increase in  
558 persistent sodium current: effects on the firing properties of rat neocortical pyramidal  
559 neurones. *J Physiol* 507 ( Pt 1): 105–16.
- 560 Melzer D, Osborne NJ, Henley WE, Cipelli R, Young A, Money C, et al. 2012. Urinary bisphenol  
561 A concentration and risk of future coronary artery disease in apparently healthy men and  
562 women. *Circulation* 125:1482–1490; doi:10.1161/CIRCULATIONAHA.111.069153.
- 563 Melzer D, Rice NE, Lewis C, Henley WE, Galloway TS. 2010. Association of urinary bisphenol a  
564 concentration with heart disease: evidence from NHANES 2003/06 . *PLoS One* 5:e8673–  
565 e8673; doi:10.1371/journal.pone.0008673.
- 566 Michaela P, Mária K, Silvia H, Ľubica L, Ľubica L. 2014. Bisphenol A Differently Inhibits  
567 CaV3.1, Ca V3.2 and Ca V3.3 Calcium Channels. *Naunyn Schmiedebergs Arch Pharmacol*  
568 387; doi:10.1007/s00210-013-0932-6.
- 569 Moon MK. 2019. Concern about the Safety of Bisphenol A Substitutes. *Diabetes Metab J*  
570 43:46–48; doi:10.4093/dmj.2019.0027.
- 571 Moreman J, Lee O, Trznadel M, David A, Kudoh T, Tyler CR. 2017. Acute Toxicity, Teratogenic,  
572 and Estrogenic Effects of Bisphenol A and Its Alternative Replacements Bisphenol S,  
573 Bisphenol F, and Bisphenol AF in Zebrafish Embryo-Larvae. *Environ Sci Technol*  
574 51:12796–12805; doi:10.1021/ACS.EST.7B03283.
- 575 Mu X, Liu J, Yuan L, Yang K, Huang Y, Wang C, et al. 2019. The mechanisms underlying the  
576 developmental effects of bisphenol F on zebrafish. *Sci Total Environ* 687;  
577 doi:10.1016/J.SCITOTENV.2019.05.489.
- 578 O'Reilly AO, Eberhardt E, Weidner C, Alzheimer C, Wallace BA, Lampert A. 2012. Bisphenol a  
579 binds to the local anesthetic receptor site to block the human cardiac sodium channel.  
580 *PLoS One* 7:e41667–e41667; doi:10.1371/journal.pone.0041667.
- 581 Patel BB, Raad M, Sebag IA, Chalifour LE. 2015. Sex-specific cardiovascular responses to  
582 control or high fat diet feeding in C57bl/6 mice chronically exposed to bisphenol A. *Toxicol*  
583 *Reports* 2:1310–1318; doi:10.1016/j.toxrep.2015.09.008.
- 584 Posnack NG. 2014. The Adverse Cardiac Effects of Di(2-ethylhexyl)phthalate and Bisphenol A.  
585 *Cardiovasc Toxicol* 14:339–357; doi:10.1007/s12012-014-9258-y.
- 586 Posnack NG, Brooks D, Chandra A, Jaimes R, Sarvazyan N, Kay MW. 2015. Physiological  
587 response of cardiac tissue to Bisphenol A: alterations in ventricular pressure and  
588 contractility. *Am J Physiol Heart Circ Physiol* 309:H267–H275;  
589 doi:10.1152/ajpheart.00272.2015.
- 590 Posnack NG, Jaimes R, Asfour H, Swift LM, Wengrowski AM, Sarvazyan N, et al. 2014.  
591 Bisphenol A Exposure and Cardiac Electrical Conduction in Excised Rat Hearts. *Environ*  
592 *Health Perspect* 122:384–90; doi:10.1289/ehp.1206157.
- 593 PR newswire. 2016. Global Bisphenol-A Market Overview 2016-2022. Available:  
594 [https://www.prnewswire.com/news-releases/global-bisphenol-a-market-overview-2016-](https://www.prnewswire.com/news-releases/global-bisphenol-a-market-overview-2016-2022---market-is-projected-to-reach-us225-billion-by-2022-up-from-156-billion-in-2016---research-and-markets-300303934.html)  
595 [2022---market-is-projected-to-reach-us225-billion-by-2022-up-from-156-billion-in-2016---](https://www.prnewswire.com/news-releases/global-bisphenol-a-market-overview-2016-2022---market-is-projected-to-reach-us225-billion-by-2022-up-from-156-billion-in-2016---research-and-markets-300303934.html)  
596 [research-and-markets-300303934.html](https://www.prnewswire.com/news-releases/global-bisphenol-a-market-overview-2016-2022---market-is-projected-to-reach-us225-billion-by-2022-up-from-156-billion-in-2016---research-and-markets-300303934.html) [accessed 31 January 2021].
- 597 Qiu W, Chen B, Greer JB, Magnuson JT, Xiong Y, Zhong H, et al. 2020. Transcriptomic  
598 Responses of Bisphenol S Predict Involvement of Immune Function in the Cardiotoxicity of  
599 Early Life-Stage Zebrafish ( *Danio rerio* ). *Environ Sci Technol* 54:2869–2877;  
600 doi:10.1021/acs.est.9b06213.
- 601 Ramadan M, Cooper B, Posnack NG. 2020. Bisphenols and phthalates: Plastic chemical  
602 exposures can contribute to adverse cardiovascular health outcomes. *Birth Defects Res*;  
603 doi:10.1002/bdr2.1752.
- 604 Ramadan M, Sherman M, Jaimes R, Chaluvadi A, Swift L, Posnack NGNG, et al. 2018.  
605 Disruption of neonatal cardiomyocyte physiology following exposure to bisphenol-a. *Sci*  
606 *Rep* 8:7356; doi:10.1038/s41598-018-25719-8.

- 607 Ribeiro E, Ladeira C, Viegas S. 2017. Occupational Exposure to Bisphenol A (BPA): A Reality  
608 That Still Needs to Be Unveiled. *Toxics* 5; doi:10.3390/toxics5030022.
- 609 Sager PT, Gintant G, Turner JR, Pettit S, Stockbridge N. 2014. Rechanneling the cardiac  
610 proarrhythmia safety paradigm: A meeting report from the Cardiac Safety Research  
611 Consortium. *Am Heart J* 167:292–300; doi:10.1016/j.ahj.2013.11.004.
- 612 Shelby MD. 2008. NTP-CERHR monograph on the potential human reproductive and  
613 developmental effects of bisphenol A. NTP CERHR MON v, vii–ix, 1-64 passim.
- 614 Talajic M, Nattel S. 1986. Frequency-dependent effects of calcium antagonists on  
615 atrioventricular conduction and refractoriness: Demonstration and characterization in  
616 anesthetized dogs. *Circulation* 74:1156–1167; doi:10.1161/01.CIR.74.5.1156.
- 617 Testai E, Hartemann P, Rodríguez-Farre E, Rastogi SC, Bustos J, Gundert-Remy U, et al.  
618 2016. The safety of the use of bisphenol A in medical devices. *Regul Toxicol Pharmacol*  
619 79:106–107; doi:10.1016/j.yrtph.2016.01.014.
- 620 Trasande L. 2017. Exploring regrettable substitution: replacements for bisphenol A. *Lancet*  
621 *Planet Heal* 1:e88–e89; doi:10.1016/S2542-5196(17)30046-3.
- 622 Valokola MG, Karimi G, Razavi BM, Kianfar M, Jafarian AH, Jaafari MR, et al. 2019. The  
623 protective activity of nanomicelle curcumin in bisphenol A-induced cardiotoxicity following  
624 subacute exposure in rats. *Environ Toxicol* 34:319–329; doi:10.1002/tox.22687.
- 625 Vandenberg LN. 2014. Non-monotonic dose responses in studies of endocrine disrupting  
626 chemicals: Bisphenol a as a case study. *Dose-Response* 12:259–276; doi:10.2203/dose-  
627 response.13-020.Vandenberg.
- 628 Vandenberg LN, Chahoud I, Heindel JJ, Padmanabhan V, Paumgarten FJR, Schoenfelder G.  
629 2010. Urinary, circulating, and tissue biomonitoring studies indicate widespread exposure  
630 to bisphenol A. *Environ Health Perspect* 118:1055–70; doi:10.1289/ehp.0901716.
- 631 Vandenberg LN, Hauser R, Marcus M, Olea N, Welshons W V. 2007. Human exposure to  
632 bisphenol A (BPA). *Reprod Toxicol* 24:139–177; doi:10.1016/j.reprotox.2007.07.010.
- 633 Wang F, Hua J, Chen M, Xia Y, Zhang Q, Zhao R, et al. 2012. High urinary bisphenol A  
634 concentrations in workers and possible laboratory abnormalities. *Occup Environ Med*  
635 69:679–684; doi:10.1136/oemed-2011-100529.
- 636 Wang Q, Cao J, Hu F, Lu R, Wang J, Ding H, et al. 2013. Effects of estradiol on voltage-gated  
637 sodium channels in mouse dorsal root ganglion neurons. *Brain Res* 1512:1–8;  
638 doi:10.1016/j.brainres.2013.02.047.
- 639 Wang Q, Cao J, Zhu Q, Luan C, Chen X, Yi X, et al. 2011. Inhibition of voltage-gated sodium  
640 channels by bisphenol A in mouse dorsal root ganglion neurons. *Brain Res* 1378:1–8;  
641 doi:10.1016/j.brainres.2011.01.022.
- 642 Yan S, Chen Y, Dong M, Song W, Belcher SM, Wang HS. 2011. Bisphenol A and 17 $\beta$ -estradiol  
643 promote arrhythmia in the female heart via alteration of calcium handling. *PLoS One*  
644 6:e25455; doi:10.1371/journal.pone.0025455.

645

646

647

648

649 **Figure Legends**

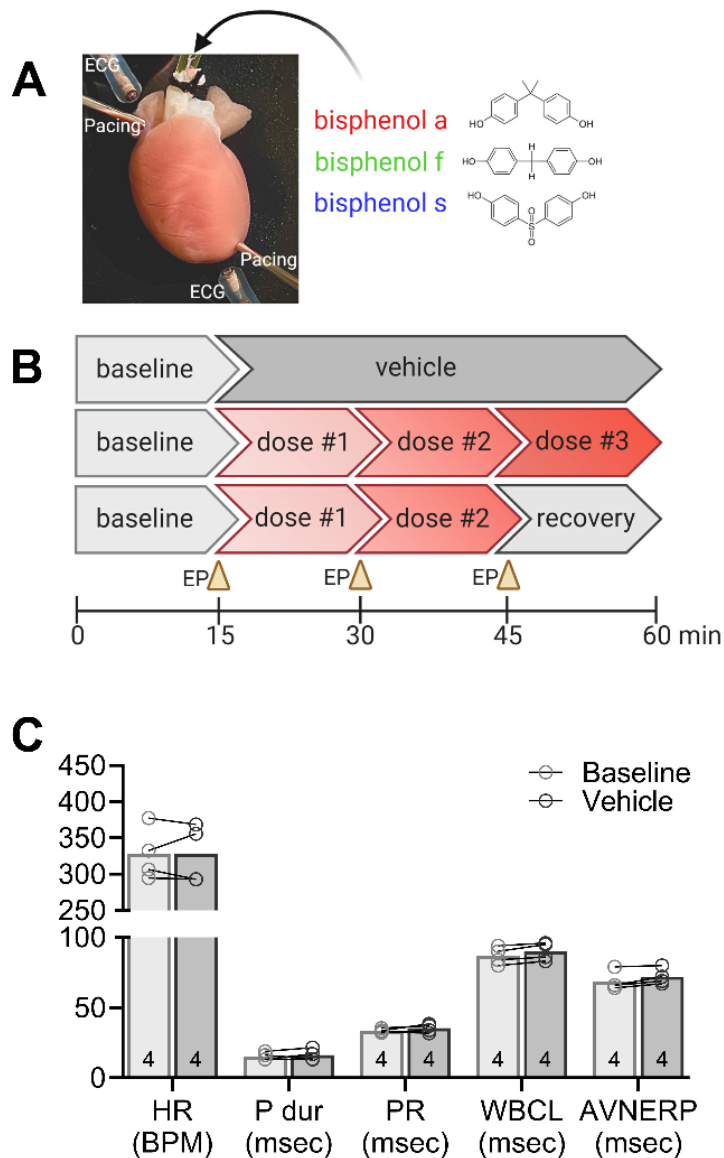

650 **Figure 1. Experimental design and vehicle control parameters.** (A) Langendorff-perfused rat  
 651 heart shown with pacing electrodes on the right atria and apex, and monopolar electrodes  
 652 placed to record electrocardiograms. (B) Schematic timeline depicts perfusion protocols used in  
 653 the study, including (top) vehicle control exposure, (middle) bisphenol chemical dose response,  
 654 (bottom) bisphenol chemical dose response and subsequent recovery. (C) Cardiac  
 655 electrophysiology parameters are consistent over time, and similar between baseline and  
 656 vehicle (0.01% DMSO) exposure. Values reported as mean  $\pm$  SD. Statistical significance  
 657 determined by RM-ANOVA with multiple comparisons testing (0.1 FDR). Number of replicates  
 658 indicated in each bar graph (n=4). ECG = location of electrocardiogram electrode, EP =  
 659 electrophysiology protocol, HR = heart rate, BPM = beats per minute, P dur = P wave duration,  
 660 PR = PR interval, WBCL = Wenckebach cycle length, AVNERP = atrioventricular node effective  
 661 refractory period, msec = milliseconds

## Nav1.5 ( $I_{Na-P}$ ) current

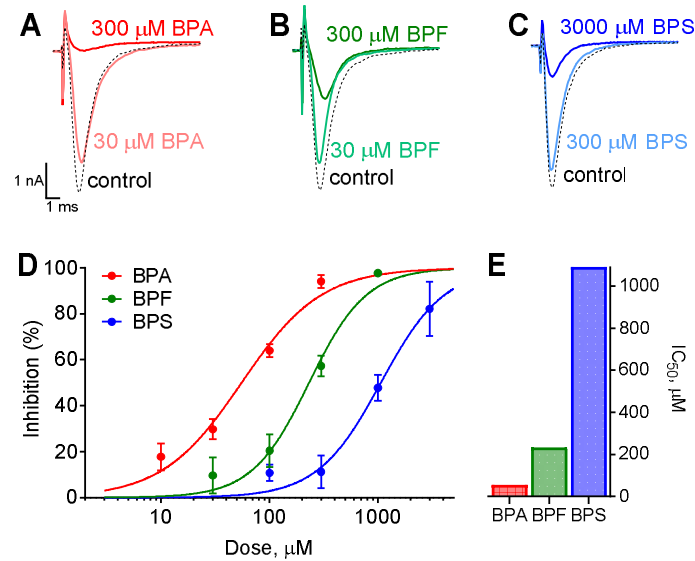

## Nav1.5 ( $I_{Na-L}$ ) current

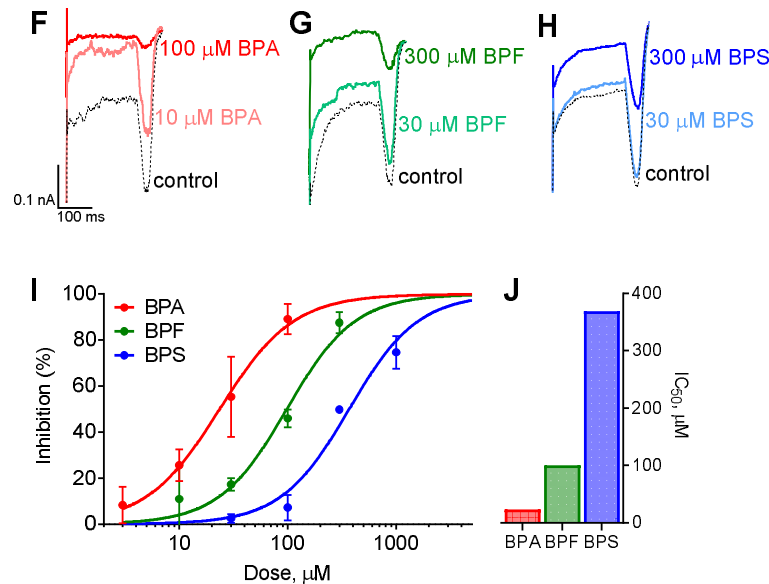

662 **Figure 2. Bisphenol inhibition of sodium currents.** Whole-cell voltage clamp recordings of  
663 fast/peak sodium current ( $I_{Na-P}$ ) following exposure to (A) BPA, (B) BPF, or (C) BPS. (D) Dose-  
664 dose-dependent inhibition of  $I_{Na-P}$  (mean  $\pm$  SD). (E) Calculated  $IC_{50}$  values are shown. Whole-cell  
665 voltage clamp recordings of late sodium current ( $I_{Na-L}$ ) following exposure to (F) BPA, (G) BPF,  
666 or (H) BPS. (I) Dose-dependent inhibition of  $I_{Na-L}$  (mean  $\pm$  SD). (J) Calculated  $IC_{50}$  values are  
667 shown.  
668

## CaV1.2 ( $I_{CaL}$ ) current

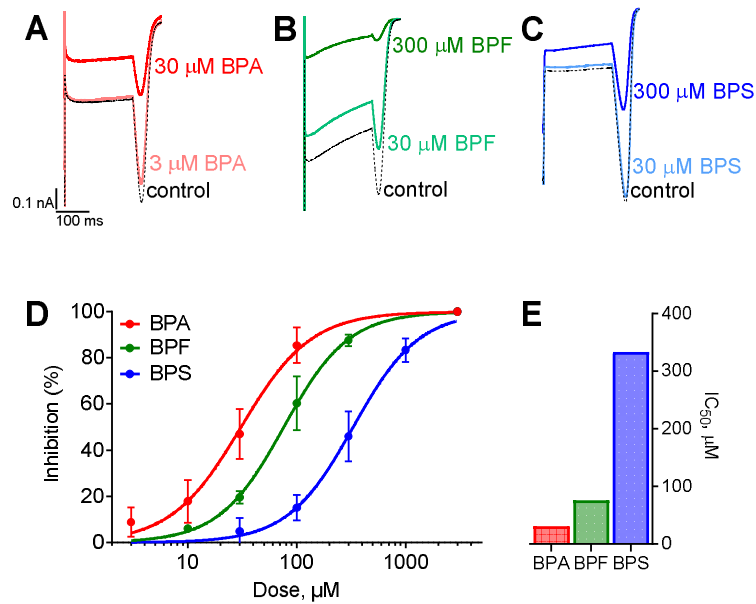

## hERG ( $I_{Kr}$ ) current

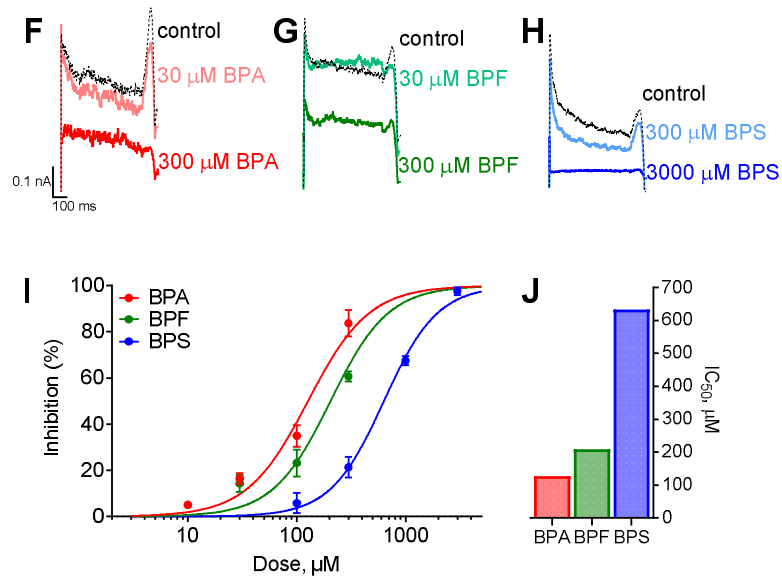

669 **Figure 3. Bisphenol inhibition of calcium and potassium currents.** Whole-cell voltage  
670 clamp recordings of L-type calcium current ( $I_{CaL}$ ) following exposure to **(A)** BPA, **(B)** BPF, or **(C)**  
671 BPS. **(D)** Dose-dependent inhibition of  $I_{CaL}$  (mean  $\pm$  SD). **(E)** Calculated  $IC_{50}$  values are shown.  
672 Whole-cell voltage clamp recordings of hERG current ( $I_{Kr}$ ) following exposure to **(F)** BPA, **(G)**  
673 BPF, or **(H)** BPS. **(I)** Dose-dependent inhibition of  $I_{Kr}$  (mean  $\pm$  SD). **(J)** Calculated  $IC_{50}$  values  
674 are shown.

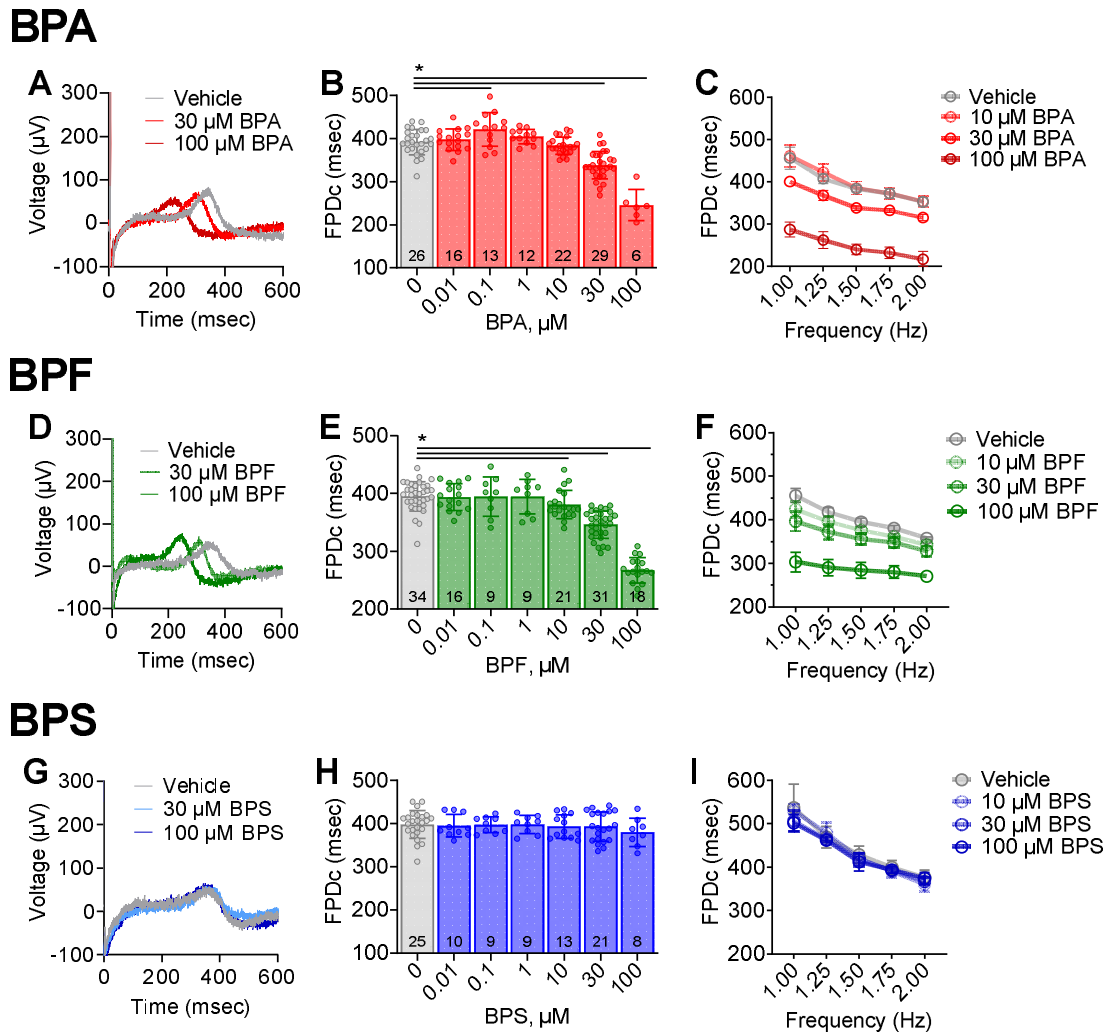

675

676 **Figure 4. Cardiomyocyte field potential duration shortens with BPA or BPF exposure, but**  
 677 **not BPS. (A)** Representative traces of extracellular field potentials recorded from hiPSC-CM  
 678 following acute exposure to vehicle, 30  $\mu$ M, or 100  $\mu$ M BPA. **(B)** Field potential duration  
 679 (corrected using Frederica formula: 'FPDc') shortens with increasing BPA exposure; single  
 680 pacing frequency (1.5 Hz). **(C)** FPDc restitution curve at multiple pacing frequencies (1-2 Hz).  
 681 **(D)** Local field potential traces following exposure to vehicle, 30  $\mu$ M, or 100  $\mu$ M BPF. **(E)** FPDc  
 682 shortens with increasing BPF exposure (1.5 Hz). **(F)** FPDc restitution curve (1-2 Hz). **(G)** Local  
 683 field potential traces following exposure 30-100  $\mu$ M BPS. **(H)** FPDc remains constant with  
 684 increasing BPS exposure (1.5 Hz). **(I)** FPDc restitution curve (1-2 Hz). Values reported as mean  
 685  $\pm$  SD. \* $q < 0.05$  as determined by ANOVA with multiple comparisons testing (0.1 FDR). Number  
 686 of replicates indicated in each bar graph.

687

## BPA heart rate

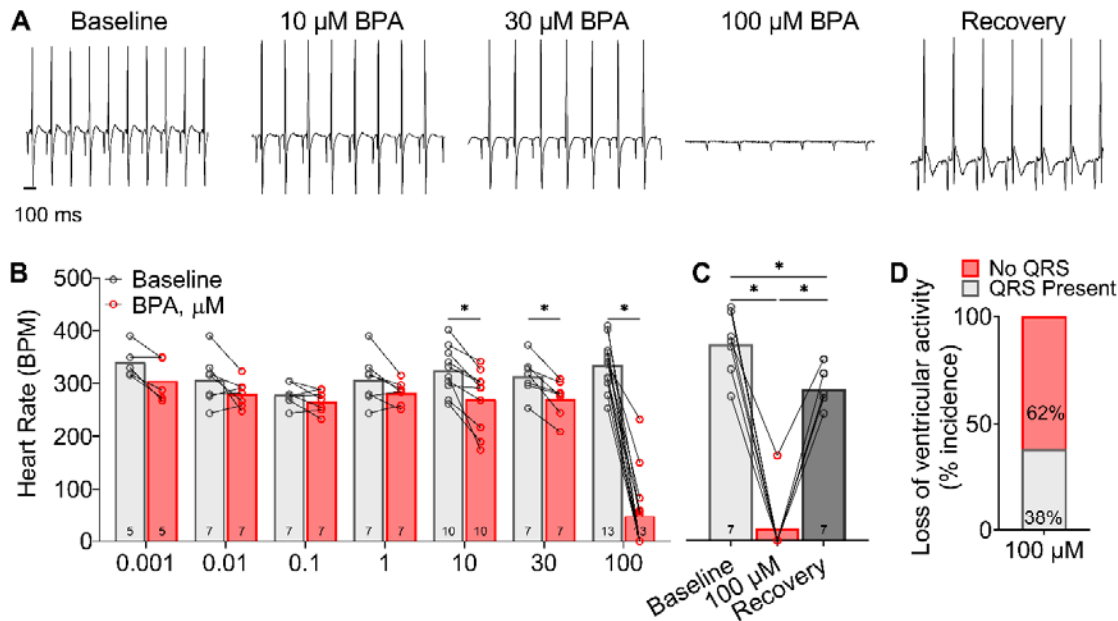

## BPF heart rate

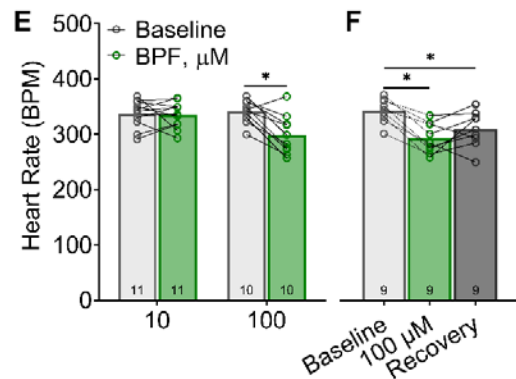

## BPS heart rate

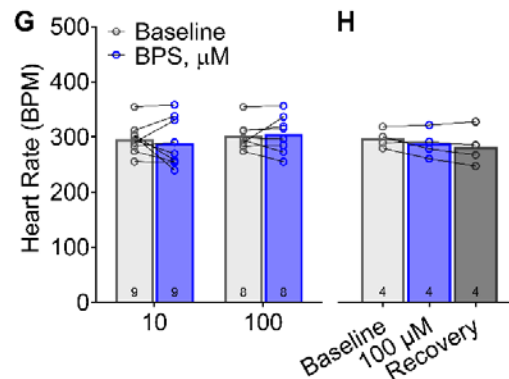

688

689 **Figure 5. Heart rate slows in the presence of BPA or BPF exposure, but not BPS. (A)**  
 690 Representative ECG recordings from Langendorff-perfused hearts at baseline, acute (15 min)  
 691 exposure to BPA, or recovery (100  $\mu\text{M}$  BPA exposure, followed by 15 min washout). **(B)**  
 692 BPA exposure results in sinus rate slowing, beginning at 10  $\mu\text{M}$  BPA. **(C)** Heart rate slowing after 100  
 693  $\mu\text{M}$  BPA exposure largely recovers after washout (15 min). **(D)** Heart rate measurements at high  
 694 BPA doses were confounded by intermittent 3<sup>rd</sup> degree heart block, with loss of ventricular  
 695 electrical activity. **(E)** Heart rate slowing following BPF exposure occurred only at highest  
 696 concentration tested (100  $\mu\text{M}$  BPF). **(F)** Heart rate slowing after 100  $\mu\text{M}$  BPF recovered slightly  
 697 after washout. **(G,H)** BPS exposure had no discernable effect on heart rate. Values reported as  
 698 mean  $\pm$  SD. \* $q < 0.05$  as determined by RM-ANOVA with multiple comparisons testing (0.1  
 699 FDR). Number of replicates indicated in each bar graph.

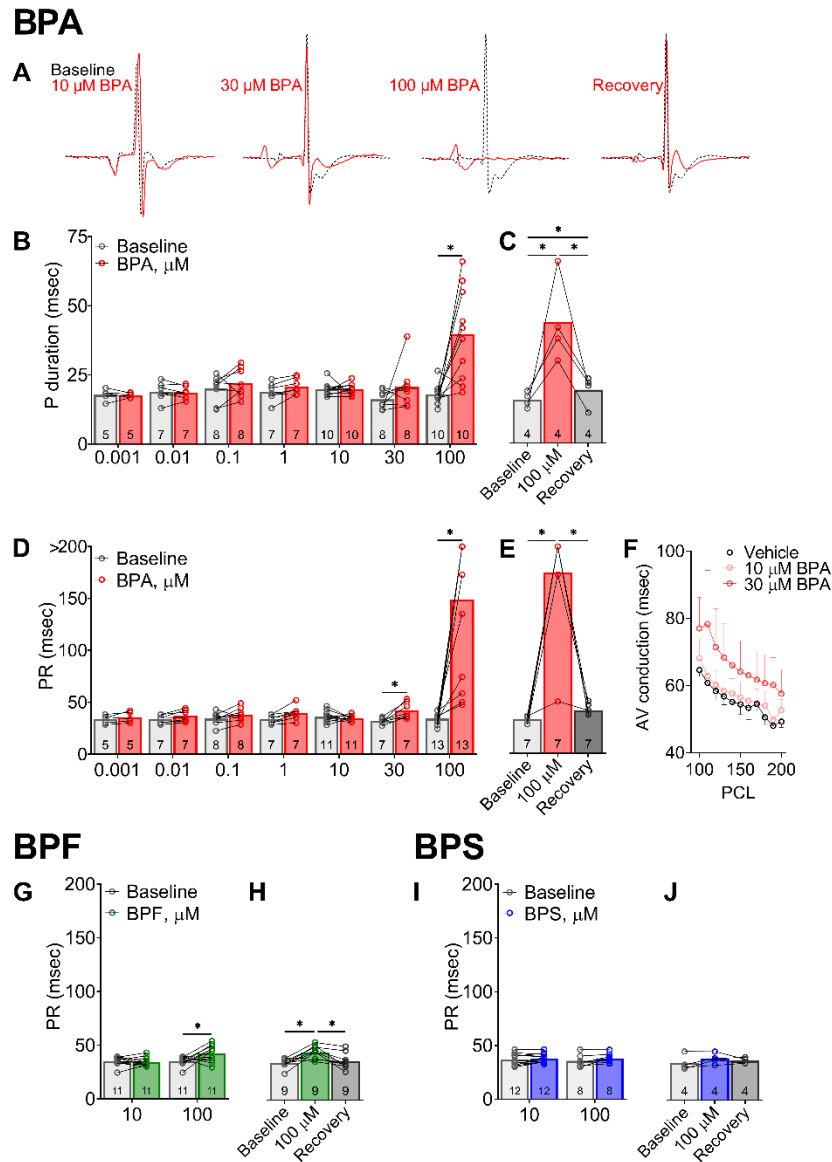

700 **Figure 6. Atrial and atrioventricular conduction slows with BPA and BPF exposure, but**  
 701 **not BPS. (A)** Representative ECG waveform from Langendorff-perfused hearts at baseline,  
 702 acute BPA exposure (15 min), or recovery (100  $\mu$ M BPA exposure, followed by 15 min  
 703 washout). Each waveform pair recorded from the same animal, before and after exposure. **(B)**  
 704 P duration indicates longer atrial depolarization time at highest BPA dose (100  $\mu$ M). **(C)**  
 705 Slowed atrial conduction after 100  $\mu$ M BPA exposure recovers after washout. **(D)** Progressive  
 706 lengthening of PR duration indicates slowed AV conduction following 30-100  $\mu$ M BPA exposure,  
 707 often resulting in intermittent 3<sup>rd</sup> degree heart block (denoted by data point >200 msec). **(E)**  
 708 AV conduction slows after 100  $\mu$ M BPA exposure and recovers after washout. **(F)** AV conduction  
 709 slowing persists with external pacing to correct for heart rate. **(G)** Atrioventricular conduction  
 710 slowing occurs only at highest BPF concentration (100  $\mu$ M) and **(H)** recovers after washout. **(I,J)**  
 711 BPS exposure had no discernable effect on atrioventricular conduction time. Values reported as  
 712 mean  $\pm$  SD. \* $q < 0.05$  as determined by RM-ANOVA with multiple comparisons testing (0.1  
 713 FDR). Number of replicates indicated in each bar graph. PCL= pacing cycle length



## BPA WBCL

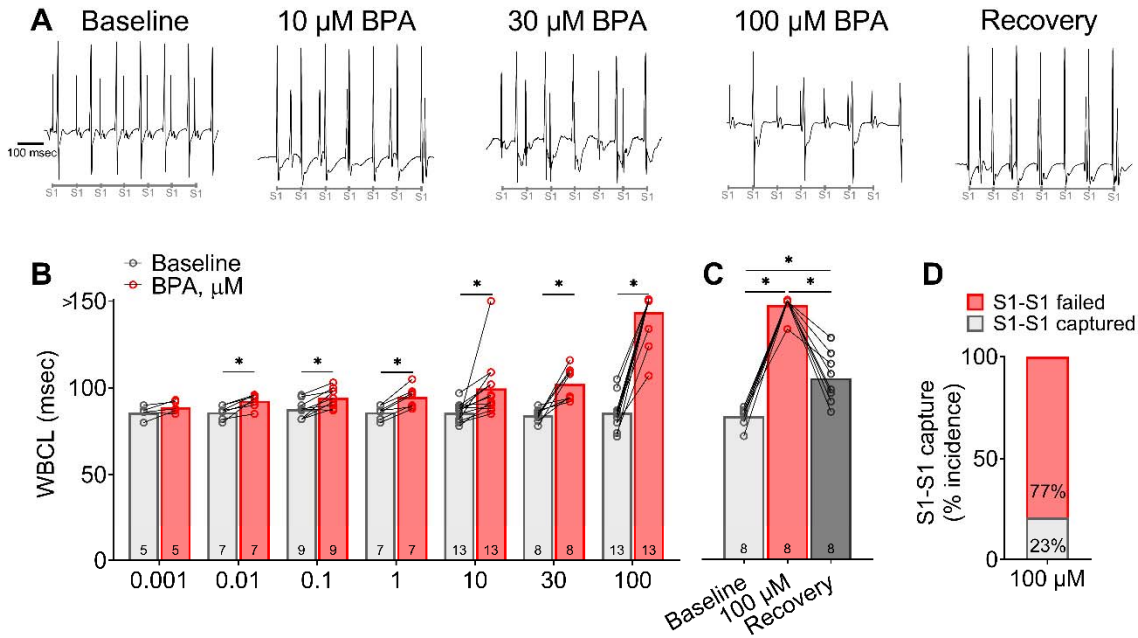

## BPF WBCL

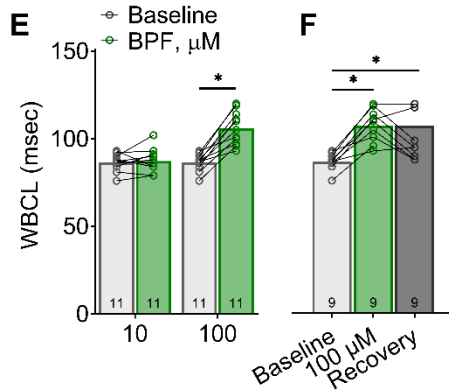

## BPS WBCL

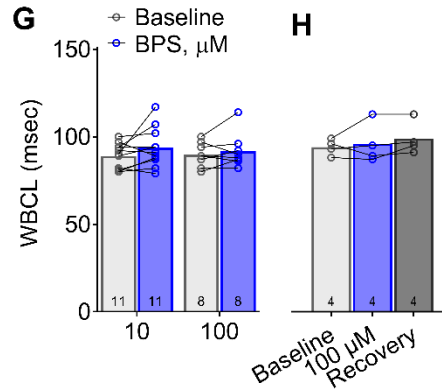

714 **Figure 7. Atrial pacing highlights atrioventricular slowing after BPA or BPF, but not BPS**  
 715 **exposure. (A)** Representative ECG recordings during atrial pacing show failure to capture in  
 716 BPA-treated hearts, indicating slowed atrioventricular conduction. Timing of S1-S1 pulses (90  
 717 msec) are indicated below. **(B)** Longer Wenckebach cycle length (WBCL) following exposure to  
 718 BPA concentrations (0.01–100  $\mu\text{M}$ ), as compared with baseline. Note: Complete Heart block  
 719 denoted by measurement >150 msec (longest S1 pacing interval tested). **(C)** Longer WBCL  
 720 after 100  $\mu\text{M}$  BPA exposure largely recovers after washout. **(D)** WBCL measurements at high  
 721 BPA doses were confounded by complete heart block. **(E)** Only 100  $\mu\text{M}$  BPF exposure results in  
 722 longer WBCL. **(F)** Moderate recovery in atrioventricular conduction after BPF washout. **(G,H)** No  
 723 change in WBCL was observed after exposure to BPS. Values reported as mean  $\pm$  SD. \* $q < 0.05$   
 724 as determined by RM-ANOVA with multiple comparisons testing (0.1 FDR). Number of  
 725 replicates indicated in each bar graph.

## BPA AVNERP

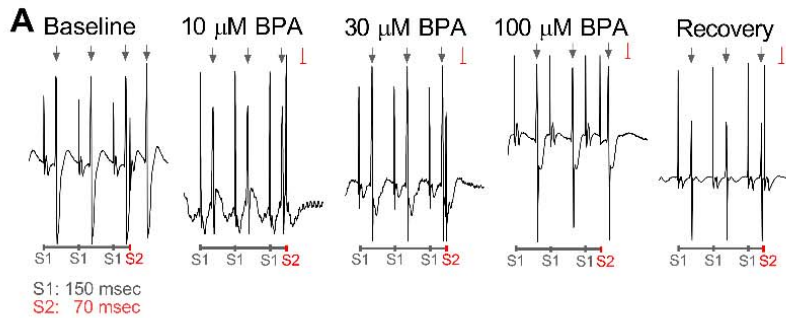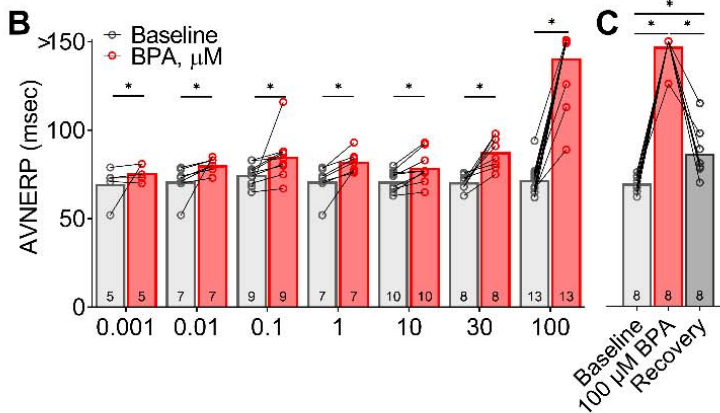

## BPF AVNERP

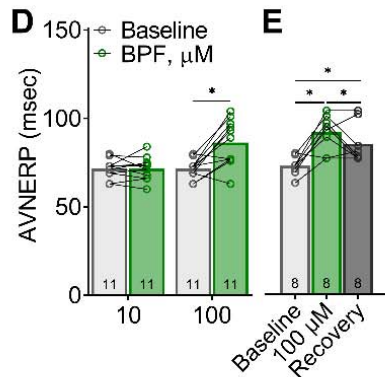

## BPS AVNERP

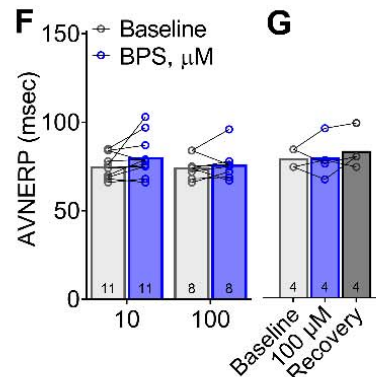

726 **Figure 8. Increased atrioventricular nodal refractoriness after exposure to BPA and BPF,**  
 727 **but not BPS. (A)** Representative ECG recordings during atrial pacing show capture ( $\downarrow$ ) and  
 728 failure to capture ( $\uparrow$ ) in response to S1-S2 pacing (150, 70 msec). **(B)** Longer atrioventricular  
 729 nodal effective refractory period (AVNERP) following exposure to BPA concentrations (1–100  
 730  $\mu$ M), as compared with baseline. Note: Complete heart block denoted by measurement >150  
 731 msec (S1 pacing interval). **(C)** Longer AVNERP after 100  $\mu$ M BPA exposure recovers after  
 732 washout. **(D)** BPF exposure results in longer AVNERP, but only at highest dose tested. **(E)**  
 733 Moderate recovery of AVNERP after BPF washout. **(F,G)** No change in AVNERP was observed  
 734 after exposure to BPS. Values reported as mean  $\pm$  SD. \* $q < 0.05$  as determined by RM-ANOVA  
 735 with multiple comparisons testing (0.1 FDR). Number of replicates indicated in each bar graph.
